# Supplementary material for: Experimental Investigation of the Effect of Implanting TiO2-NPs on PVC for Long-Term UF Membrane Performance to Treat Refinery Wastewater
Source: PubMed Central journal article supplement (PMC7231373; doi:10.3390/membranes10040077), 2020-04-21
Supplement: membranes-10-00077-s001.pdf [file membranes-10-00077-s001.pdf]

## Supplementary information document

# Experimental investigation of the effect of implanting TiO<sub>2</sub>-NPs on PVC for long-term UF membrane performance to treat refinery wastewater

Faris H. Al-Ani<sup>1</sup>, Qusay F. Alsahy<sup>2</sup> and Rawia Subhi Raheem<sup>1</sup>, Khalid T. Rashid<sup>2</sup>, Alberto Figoli<sup>3</sup>

<sup>1</sup>Civil Engineering Department, University of Technology, Alsinaa Street 52, Baghdad, Iraq

<sup>2</sup>Membrane Technology Research Unit, Chemical Engineering Department, University of Technology, Alsinaa Street 52, Baghdad, Iraq

<sup>3</sup>Institute on Membrane Technology, National Research Council (ITM-CNR), 87030 Rende (CS), Italy

Corresponding authors: Prof. Dr. Qusay F. Alsahy; E-mail: [qusay\\_alsahy@yahoo.com](mailto:qusay_alsahy@yahoo.com); [80006@uotechnology.edu.iq](mailto:80006@uotechnology.edu.iq), Mobile phone: +964-7901730181

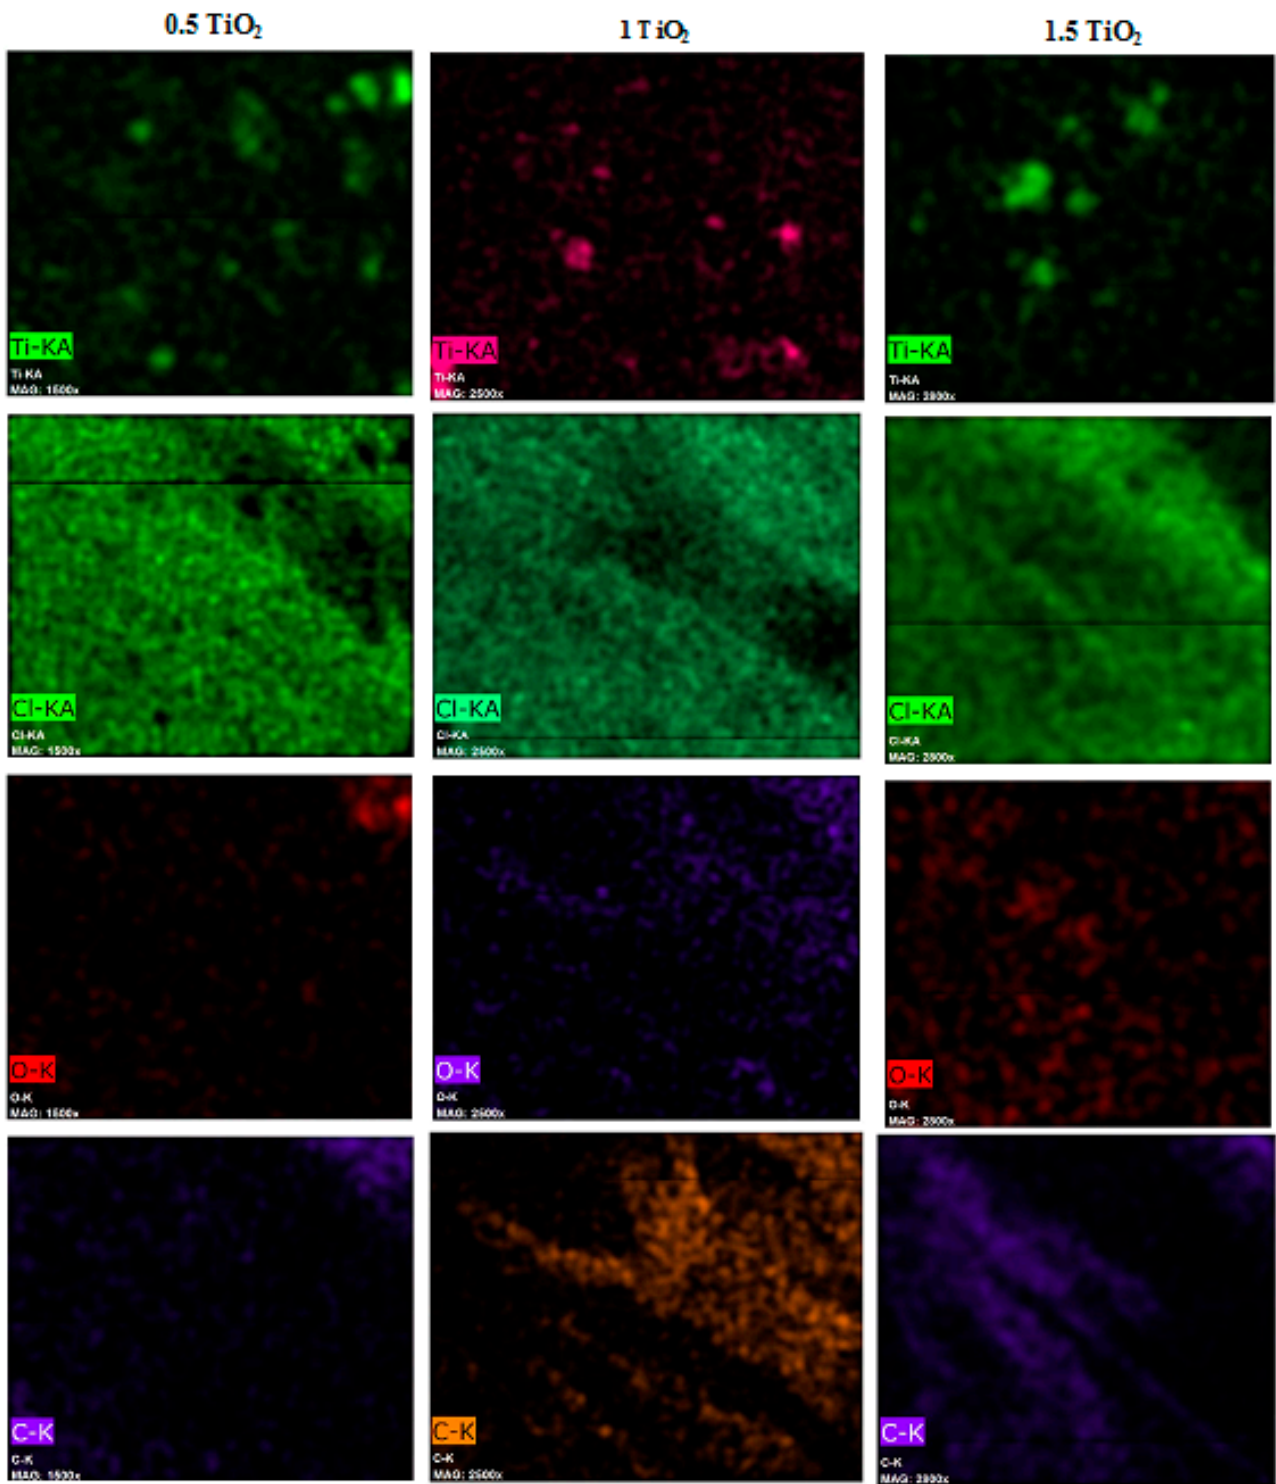

Figure S1. EDX color mapping of elemental analysis of the PVC/TiO<sub>2</sub> membrane.
